# Supplementary material for: Mercury in the Arctic tundra snowpack: temporal and spatial concentration patterns and trace gas exchanges
Source: Copernicus journal article supplement (doi:10.5194/tc-12-1939-2018), 2018-06-06
Supplement: Supplementary file 1 [file datasetTC_Agnan.xlsx]

## Sheet: Toolik
Date	Type	Height (cm)	THg (ng/L)	DHg (ng/L)	d2H (permil)	d18O (permil)	Cl- (mg/L)	NO3- (mg/L)	SO42- (mg/L)	Na+ (mg/L)	NH4+ (mg/L)	K+ (mg/L)	Mg2+ (mg/L)	Ca2+ (mg/L)
2014-10-14	tundra	33.5	0.195	0.174	-172.438	-23.325	0.0789	0.1231	0.2955	0.0496	0.0267	0.0093	0.0061	0.0463
2014-10-14	tundra	24.75	0.27	0.08	-168.103	-23.5648	0.0983	0.0833	0.3286	0.0581	0.0151	0.0177	0.0064	0.0397
2014-10-14	tundra	12.5	0.04	0.149	-155.748	-21.094	0.0529	0.0967	0.1619	0.037	0.0058	0.0094	0.0031	0.0451
2014-10-14	tundra	39	0.25	0.18	-175.274	-24.0607	0.0925	0.1335	0.3037	0.0574	0.0135	0.0054	0.0051	0.0302
2014-10-14	tundra	25.5	0.218	0.191	-166.029	-23.1863	0.0561	0.1383	0.1755	0.033	0.0099	0.0028	0.0035	0.0346
2014-10-14	tundra	13	0.294	0.04	-151.516	-20.6108	0.0798	0.1505	0.5363	0.0344	0.0211	0.0054	0.0056	0.0728
2014-12-07	surface		0.236	0.04	-183.212	-25.6414	0.0294	0.212	0.406467	0.0224	0.0138333	0.00226667	0.00343333	0.0485
2014-12-07	surface		0.188	0.04	-185.317	-25.6458	0.0289	0.204	0.4195	0.0182	0.0098	0.0022	0.0035	0.0376
2014-12-07	surface		0.196	0.04	-189.401	-26.5169	0.0284	0.2036	0.424	0.0167	0.0132	0.0014	0.0032	0.0364
2014-12-07	tundra	21	0.811	0.103	-209.309	-28.3669	0.126167	0.2693	0.388267	0.0663333	0.0102	0.0170667	0.0253667	0.862233
2014-12-07	tundra	11	0.144	0.205	-150.463	-20.514	0.0739	0.1683	0.3983	0.065	0.0092	0.0088	0.0817	0.3613
2014-12-08	tundra	21	0.04	0.145	-147.021	-20.2589	0.0359	0.1393	0.18	0.0239	0.0076	0.0022	0.0128	0.0968
2014-12-08	tundra	11	1.982	0.121	-170.184	-23.393	0.1086	0.2724	0.4818	0.0537	0.0141	0.0086	0.0232	0.9354
2014-12-31	surface		0.685	0.107	-173.024	-22.766	0.161833	0.0842333	0.1159	0.0984	0.00603333	0.0086	0.0028	0.1778
2014-12-31	surface		0.175	0.189	-173.547	-23.0058	0.3008	0.1233	0.2053	0.0922	0.0106	0.0148	0.0024	0.253
2014-12-31	surface		0.23	0.219	-196.041	-25.5905	0.6108	0.2912	0.474	0.1099	0.0118	0.0278	0.006	0.5888
2015-01-25	lake	8	0.345	0.175	0.2115	-26.5351	0.0524	0.1838	0.0952	0.0278	0.0159	0.0057	0.0037	0.0688
2015-01-25	lake	8	0.266	0.248
2015-01-25	tundra	49.5	0.362	0.262	-198.083	-26.0177	0.0423	0.1492	0.1058	0.0232	0.00505	0.0033	0.00775	0.1231
2015-01-25	tundra	36.5	6.23	0.04	-193.86	-25.9511	0.371425	0.35735	0.27365	0.1007	0.012425	0.056025	0.021825	0.598125
2015-01-25	tundra	25	0.354	0.189	-201.773	-27.2152	0.5456	0.49395	0.25885	0.09105	0.0127	0.05135	0.0167	0.462
2015-01-25	tundra	9.5	0.156	0.122	-185.119	-25.0057	0.3314	0.294133	0.2239	0.0757667	0.0153333	0.0400333	0.00906667	0.196167
2015-01-26	tundra	25	0.574	0.04	-183.503	-24.1615	0.078	0.2602	0.2042	0.0360667	0.0130333	0.00623333	0.0120333	0.365033
2015-01-26	tundra	10.5	0.403	0.04	-154.352	-21.1359	0.074	0.1089	0.541	0.0249	0.0194	0.1135	0.0087	0.1438
2015-01-27	surface		0.145	0.173	-278.857	-36.8486	0.0548	0.155133	0.151367	0.0148	0.00963333	0.00236667	0.0032	0.0556667
2015-01-27	surface		0.446	0.085	-307.978	-40.7301	0.0429333	0.109933	0.180533	0.0108	0.0101	0.00253333	0.0028	0.0612333
2015-01-27	surface		0.21	0.087	-313.78	-41.2687	0.8031	0.1081	0.16515	0.4802	0.00545	0.16355	0.00465	0.05895
2015-02-20	surface		0.192	0.141	-175.947	-23.1922	0.1437	0.6905	0.2867	0.1041	0.0105	0.0373	0.0165	0.5483
2015-02-20	surface		0.195	0.139	-165.535	-22.2151	0.2829	0.3604	0.4251	0.134167	0.0201333	0.0194333	0.0212333	0.363467
2015-02-20	surface		0.145	0.101	-139.553	-18.2918	0.3883	0.1357	0.3325	0.1811	0.0143	0.0123	0.0168	0.1885
2015-03-08	lake	10	0.75	0.04	-181.395	-23.4101	0.0677	0.1646	0.2613	0.0328	0.0121	0.0099	0.0232	0.4815
2015-03-08	lake	11	0.724	0.04	-181.2	-23.5156	0.0725	0.2014	0.3055	0.0413	0.0103	0.011	0.0279	0.6355
2015-03-08	tundra	50	0.595	0.16	-206.767	-27.3007	0.0523	0.1652	0.2535	0.0304	0.0175	0.0065	0.0126	0.2175
2015-03-08	tundra	38.5	0.844	0.18	-208.82	-27.5427	0.0738	0.2767	0.5312	0.0343	0.0201	0.0092	0.0215	0.652
2015-03-08	tundra	26	0.214	0.113	-159.233	-21.8603	0.162075	0.208475	0.285275	0.052975	0.01185	0.0121	0.01	0.214275
2015-03-08	tundra	13	0.328	0.04	-160.239	-21.6948	0.0652	0.0832	0.2497	0.0294	0.0195	0.0055	0.0054	0.0648
2015-03-08	tundra	44	0.732	0.135	-194.448	-25.4133	0.1093	0.1959	0.2657	0.0507	0.0084	0.005	0.0175	0.2475
2015-03-08	tundra	32	0.341	0.04	-164.301	-22.531	0.0484	0.1807	0.2011	0.0248	0.0094	0.0027	0.0092	0.2615
2015-03-08	tundra	22.5	0.171	0.04	-153.706	-21.0642	0.0385	0.1193	0.2095	0.0201	0.0079	0.0016	0.004	0.0424
2015-03-08	tundra	13	0.255	0.107	-154.838	-20.8797	0.295	0.1984	0.34905	0.0642	0.0101	0.23015	0.02085	0.2414
2015-04-03	surface			0.282
2015-04-03	surface			0.202
2015-04-17	lake	10	1.592	0.132	-175.274	-22.6528
2015-04-17	lake	11	1.267	0.04	-181.908	-23.8092
2015-04-17	surface		0.734	0.221	-200.69	-26.7235
2015-04-17	surface		1.159	0.236	-188.252	-24.997
2015-04-17	surface		0.714	0.166	-189.857	-25.437
2015-04-17	tundra	35	1.35	0.283	-193.934	-25.6497
2015-04-17	tundra	25	0.568	0.259	-186.319	-24.4157
2015-04-17	tundra	15	1.528	0.186	-187.232	-25.2534
2015-04-17	tundra	5	1.356	0.492	-156.603	-21.2902
2015-04-17	tundra	35	0.707	0.271	-197.022	-25.873
2015-04-17	tundra	25	0.644	0.367	-180.516	-24.2951
2015-04-17	tundra	15	0.944	0.396	-158.66	-21.9622
2015-04-17	tundra	5	0.473	0.176	-154.07	-21.1729
2015-10-19	surface		0.288848	0.0816706	-169.306	-23.3707
2015-10-19	surface		0.309842	0.170111	-170.695	-23.4858
2015-10-19	surface		0.349551	0.159945	-168.781	-23.1077
2015-11-15	surface		0.620552	0.170936	-220.575	-30.8954
2015-11-15	surface		0.46287	0.35706	-228.351	-32.7545
2015-11-15	surface		0.286647		-228.317	-32.7741
2015-12-05	surface		0.200392	0.04	-239.518	-33.441
2015-12-05	surface		0.179895	0.164295	-237.801	-33.1894
2015-12-05	tundra	17	0.511308	0.169306	-172.055	-22.9722
2015-12-05	tundra	8	0.427724	0.184293	-175.917	-23.645
2015-12-05	tundra	34	0.317812	0.119163	-194.573	-26.647
2015-12-05	tundra	25.5	0.783339	0.230224	-140.931	-19.8438
2015-12-05	tundra	14	0.344504	0.224934	-147.871	-21.3288
2015-12-05	tundra	7.5	0.315035	0.361588	-167.781	-23.0542
2016-01-13	surface		1.41949	0.165765	-200.196	-26.2525
2016-01-13	surface		0.667157	0.180982	-182.213	-24.4929
2016-01-13	surface		0.378425	0.04	-160.173	-21.8839
2016-01-27	tundra	35	0.996462	0.183682	-212.373	-28.0395	0.1104	0.3357	0.1264					0.75
2016-01-27	tundra	25	1.22096	0.19573	-221.359	-29.0087	0.1307	0.3762	0.1447					0.7637
2016-01-27	tundra	15	0.430625	0.158886	-180.655	-24.0879		0.1082	0.0719					0.4305
2016-01-27	tundra	5			-177.268	-23.5288		0.0656				0.274		0.3284
2016-01-27	tundra	25	0.15595	0.123255	-194.79	-25.7677	0.1171	0.2638	0.1616	0.0599				0.9664
2016-01-27	tundra	15	0.684155	0.227054	-164.528	-21.7652		0.0786	0.0775					0.6549
2016-01-27	tundra	5	0.643148	0.172868	-165.104	-21.913		0.0837	0.0731					0.6121
2016-01-29	lake	5	2.07858	0.289315	-162.323	-19.477	0.218	0.4203	0.2292	0.0944				1.1971
2016-01-29	lake	5	1.18972	0.200267	-154.819	-18.0336	0.2581	0.375	0.225	0.383		0.0659	0.0565	1.3153
2016-02-01	surface		0.211392	0.309089	-185.788	-24.3603	0.1641	0.2164	0.1236	0.1				0.1047
2016-02-01	surface		0.428291	0.295021	-185.354	-24.3144	0.065	0.2097	0.1294					0.1164
2016-02-01	surface		0.499094	0.276361	-185.281	-24.1706	0.0957	0.1941	0.122	0.0638				0.1018
2016-02-20	surface		0.471929	0.181039	-183.682	-24.4503	0.3348	0.6166	0.2425	0.0957				0.3396
2016-02-20	surface		0.756942	0.328022	-180.169	-23.9462	0.8267	0.8944	0.3182	0.159		0.0876		0.8547
2016-02-20	surface		0.559228	0.197805	-190.931	-25.0695	0.2774	0.429	0.1853	0.131				0.3992
2016-03-02	surface		0.443852	0.362786	-167.641	-22.207	0.1609	0.224	0.068	0.129
2016-03-02	surface		0.425508	0.341349	-168.784	-22.4532	0.0754	0.3168	0.0826					0.0872
2016-03-02	surface		0.367723	0.276055	-167.882	-22.3556	0.3798	0.3809	0.1145	0.1788				0.1349
2016-03-25	lake	13	0.306964	0.187996	-174.151	-22.2449	0.1049	0.2781	0.1411					1.0175
2016-03-25	lake	13	0.534853	0.152893	-173.458	-21.905	0.1351	0.3658	0.176					1.11
2016-03-25	surface		1.04664	0.45451	-248.151	-33.1857		0.2984	0.075					0.9505
2016-03-25	surface		0.927613	0.517876	-249.513	-33.3438		0.3085	0.0792					1.0107
2016-03-25	surface		1.05141	0.505987	-249.64	-33.3966	0.0562	0.3452	0.0795					1.0902
2016-03-25	tundra	50	0.583414	0.134973	-198.984	-26.3654	0.0682	0.3177	0.1253					0.3045
2016-03-25	tundra	40	0.854507	0.144537	-191.457	-25.3456	0.1229	0.3294	0.1852					1.5193
2016-03-25	tundra	30	0.539933	0.10008	-191.372	-26.1327	0.0813	0.3219	0.1355					1.0102
2016-03-25	tundra	20	0.348195	0.04	-161.663	-22.4543	0.3893	0.1067	0.1575	0.1893				0.5613
2016-03-25	tundra	10	0.373021	0.134022	-173.15	-23.9043	0.2733		0.3975	0.1606		0.2093	0.1543	0.8124
2016-03-25	tundra	20	0.268852	0.08823	-185.005	-24.5126	0.1693	0.2874	0.1302	0.0871				0.9864
2016-03-25	tundra	10	0.553164	0.254994	-169.724	-22.3181	0.1232	0.1744	0.1223			0.3919		1.0854
2016-04-02	surface		1.60651	1.14392	-248.039	-32.4507		0.1825						0.1029
2016-04-02	surface		1.48471	1.30253	-246.611	-32.1615		0.193						0.0708
2016-04-02	surface		1.2978	1.00336	-242.688	-31.5113		0.151
2016-04-13	surface		0.199389	0.140269	-199.626	-25.7637			0.1366					0.5914
2016-04-13	surface		0.240352	0.134415	-200.33	-26.0282			0.0733					0.3278
2016-04-13	surface		0.189052	0.128295	-199.336	-25.8876			0.0824					0.4028
2016-05-01	lake	13	0.193463	0.105365	-209.29	-26.7777	0.0627	0.2173	0.0959	0.1352				0.5511
2016-05-01	lake	13	0.294289	0.142138	-202.989	-25.7328	0.0861	0.228	0.1013					0.68
2016-05-01	surface		0.875658	0.313553	-196.892	-25.0688	0.1094	0.1068	0.1					2.2784
2016-05-01	surface		0.700849	0.174731	-201.675	-25.7047	0.0652	0.0968	0.0779					1.7442
2016-05-01	surface		0.417137	0.187795	-208.431	-26.6146		0.1067	0.0632					0.9168
2016-05-01	tundra	35	0.297106	0.195316	-218.346	-28.2496	0.1866	0.3254	0.1287					1.3683
2016-05-01	tundra	25	1.91566	0.175469	-191.957	-24.8003	0.1523	0.3216	0.1875	0.0627			0.0961	2.0399
2016-05-01	tundra	15	0.43046	0.115696	-177.562	-23.8224	0.1167	0.0687	0.0638			0.1967		0.4678
2016-05-01	tundra	30	0.124511	0.04	-211.987	-27.2137		0.1952	0.1029					0.6729
2016-05-01	tundra	20	0.22419	0.0943454	-176.887	-23.7535	0.0923	0.0924						0.8218

## Sheet: transect
Easting	Northing	Elevation (m)	height	THg (ng/L)	DHg (ng/L)	d2H (permil)	d18O (permil)
424573	7.62881e+06	500.626	20	1.318	0.172	-181.515	-23.7601
424573	7.62881e+06	500.626	30	0.223	0.112	-188.246	-24.7129
424573	7.62881e+06	500.626	40	0.222	0.133	-203.101	-26.8302
427102	7.65935e+06	400.324	23	0.149	<DL	-205.155	-27.5252
427102	7.65935e+06	400.324	33	0.268	0.132	-194.34	-25.6763
427102	7.65935e+06	400.324	13	1.792	0.278	-160.031	-21.3769
434531	7.70222e+06	333.24	15	0.18	<DL	-130.124	-17.6235
434531	7.70222e+06	333.24	25	0.183	<DL	-145.169	-19.7983
434531	7.70222e+06	333.24	35	0.096	<DL	-219.265	-28.6539
434531	7.70222e+06	333.24	45	0.248	0.128	-198.732	-25.7743
437481	7.71866e+06	144.553	22	0.381	0.126	-174.879	-23.7018
437481	7.71866e+06	144.553	32	0.567	0.384	-202.26	-27.1132
437481	7.71866e+06	144.553	12	0.335	0.24	-133.647	-17.7353
434092	7.73045e+06	118.185	20	0.363	0.136	-185.677	-25.2494
434092	7.73045e+06	118.185	30	0.317	0.228	-169.973	-23.7961
434092	7.73045e+06	118.185	40	0.603	0.341	-206.461	-27.4192
434092	7.73045e+06	118.185	10	0.921	0.225	-134.981	-18.8531
432462	7.74816e+06	83.885	41	0.536	0.192	-115.709	-16.4248
432462	7.74816e+06	83.885	51	1.472	0.861	-191.804	-26.1411
432462	7.74816e+06	83.885	61	0.862	0.459	-206.333	-27.7047
435872	7.76711e+06	46.351	19	0.775	0.261	-150.575	-21.1256
435872	7.76711e+06	46.351	29	0.418	0.287	-208.942	-27.9364
443505	7.78131e+06	21.472	15	0.726	0.204	-172.293	-23.3026
443505	7.78131e+06	21.472	25	3.792	0.742	-184.827	-25.1372
Coordinate System: UTM NAD83 (2011)
Elevation: MSL (Geoid 12 - Alaska)
