# Supplementary material for: Mercury in the Arctic tundra snowpack: temporal and spatial concentration patterns and trace gas exchanges
Source: Copernicus journal article supplement (doi:10.5194/tc-12-1939-2018), 2018-06-06
Supplement: Supplementary file 1 [file tc-12-1939-2018-supplement.zip]

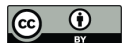

## *Supplement of*

# **Mercury in the Arctic tundra snowpack: temporal and spatial concentration patterns and trace gas exchanges**

**Yannick Agnan et al.**

*Correspondence to:* Yannick Agnan ([yannick.agnan@biogeochimie.fr](mailto:yannick.agnan@biogeochimie.fr)) and Daniel Obrist ([daniel\\_obrist@uml.edu](mailto:daniel_obrist@uml.edu))

- [tc-12-1939-2018-supplement-title-page.pdf](#)
- [Agnan\\_et\\_al.\\_TC\\_SI.pdf](#)
- [datasetTC\\_Agnan.xlsx](#)

The copyright of individual parts of the supplement might differ from the CC BY 4.0 License.
