# Supplementary material for: Mercury in the Arctic tundra snowpack: temporal and spatial concentration patterns and trace gas exchanges
Source: Copernicus journal article supplement (doi:10.5194/tc-12-1939-2018), 2018-06-06
Supplement: Supplementary file 2 [file tc-12-1939-2018-supplement.zip]

**Table S1: Geographical coordinates of transect sampling sites.**

| site       | latitude   | longitude   | elevation (m) | distance to Dalton Highway (m) |
|------------|------------|-------------|---------------|--------------------------------|
| transect 1 | 68.7605° N | 148.8659° W | 501           | 730                            |
| transect 2 | 69.0350° N | 148.8258° W | 400           | 230                            |
| transect 3 | 69.4212° N | 148.6691° W | 333           | 210                            |
| transect 4 | 69.5692° N | 148.6049° W | 145           | 560                            |
| transect 5 | 69.6741° N | 148.7003° W | 118           | 240                            |
| transect 6 | 69.8324° N | 148.7555° W | 84            | 140                            |
| transect 7 | 70.0031° N | 148.6804° W | 46            | 250                            |
| transect 8 | 70.1323° N | 148.4896° W | 21            | 250                            |

**Table S2: Summary total ( $Hg_{tot}$ ) and dissolved  $Hg$  ( $Hg_{diss}$ ) concentrations in snowpack and surface snow layers on the tundra and lake at Toolik Field Station.**

| date                       | location | height (cm) | $Hg_{tot}$ (ng L <sup>-1</sup> ) |                 | $Hg_{diss}$ (ng L <sup>-1</sup> ) |                 |
|----------------------------|----------|-------------|----------------------------------|-----------------|-----------------------------------|-----------------|
|                            |          |             | mean                             | SD <sup>a</sup> | mean                              | SD <sup>a</sup> |
| Oct. 14 <sup>th</sup> 2014 | tundra   | 36          | 0.22                             | 0.04            | 0.18                              | 0.00            |
|                            |          | 25          | 0.24                             | 0.04            | 0.14                              | 0.08            |
|                            |          | 13          | 0.17                             | 0.18            | 0.09                              | 0.08            |
| Dec. 7 <sup>th</sup> 2014  | tundra   | surface     | 0.21                             | 0.03            | <DL <sup>b</sup>                  | –               |
|                            |          | 21          | 0.43                             | 0.55            | 0.12                              | 0.03            |
|                            |          | 11          | 1.06                             | 1.30            | 0.16                              | 0.06            |
| Dec. 31 <sup>st</sup> 2014 | tundra   | surface     | 0.36                             | 0.28            | 0.17                              | 0.06            |
|                            |          | surface     | 0.27                             | 0.16            | 0.12                              | 0.05            |
|                            |          | 50          | 0.36                             | –               | 0.26                              | –               |
| Jan. 26 <sup>th</sup> 2015 | tundra   | 37          | 6.23                             | –               | <DL <sup>b</sup>                  | –               |
|                            |          | 25          | 0.46                             | 0.16            | 0.11                              | 0.11            |
|                            |          | 10          | 0.28                             | 0.17            | 0.08                              | 0.06            |
|                            | lake     | 8           | 0.31                             | 0.06            | 0.21                              | 0.05            |
| Feb. 20 <sup>th</sup> 2015 | tundra   | surface     | 0.18                             | 0.03            | 0.13                              | 0.02            |
|                            |          | 48          | 0.66                             | 0.10            | 0.15                              | 0.02            |
|                            |          | 37          | 0.59                             | 0.36            | 0.11                              | 0.10            |
| Mar. 8 <sup>th</sup> 2015  | tundra   | 25          | 0.19                             | 0.03            | 0.08                              | 0.05            |
|                            |          | 13          | 0.29                             | 0.05            | <DL <sup>b</sup>                  | –               |
|                            | lake     | 11          | 0.74                             | 0.02            | <DL <sup>b</sup>                  | –               |
| Apr. 3 <sup>rd</sup> 2015  | tundra   | surface     | –                                | –               | 0.24                              | 0.06            |
|                            |          | surface     | 0.87                             | 0.25            | 0.21                              | 0.04            |
| Apr. 17 <sup>th</sup> 2015 | tundra   | 35          | 1.03                             | 0.45            | 0.28                              | 0.01            |
|                            |          | 25          | 0.61                             | 0.05            | 0.31                              | 0.08            |
|                            |          | 15          | 1.24                             | 0.41            | 0.29                              | 0.15            |
|                            |          | 5           | 0.91                             | 0.62            | 0.33                              | 0.22            |
|                            | lake     | 11          | 1.43                             | 0.23            | 0.09                              | 0.07            |

<sup>a</sup> standard deviation (n = 2 for snowpack and n = 3 for surface snow)

<sup>b</sup> below detection limit

“–” no data

Table S2: Continued.

| date                       | location | height (cm) | Hg <sub>tot</sub> (ng L <sup>-1</sup> ) |                 | Hg <sub>diss</sub> (ng L <sup>-1</sup> ) |                 |
|----------------------------|----------|-------------|-----------------------------------------|-----------------|------------------------------------------|-----------------|
|                            |          |             | mean                                    | SD <sup>a</sup> | mean                                     | SD <sup>a</sup> |
| Oct. 19 <sup>th</sup> 2015 | tundra   | surface     | 0.32                                    | 0.03            | 0.12                                     | 0.07            |
| Nov. 15 <sup>th</sup> 2015 | tundra   | surface     | 0.46                                    | 0.17            | 0.26                                     | 0.13            |
| Dec. 5 <sup>th</sup> 2015  | tundra   | surface     | 0.19                                    | 0.01            | 0.10                                     | 0.09            |
|                            |          | 34          | 0.32                                    | –               | 0.12                                     | –               |
|                            |          | 26          | 0.78                                    | –               | 0.23                                     | –               |
|                            |          | 16          | 0.43                                    | 0.12            | 0.20                                     | 0.04            |
|                            |          | 8           | 0.37                                    | 0.08            | 0.27                                     | 0.13            |
| Jan. 13 <sup>th</sup> 2016 | tundra   | surface     | 0.82                                    | 0.54            | 0.13                                     | 0.08            |
| Jan. 29 <sup>th</sup> 2016 | tundra   | surface     | 0.38                                    | 0.15            | 0.29                                     | 0.02            |
|                            |          | 35          | 1.00                                    | –               | 0.18                                     | –               |
|                            |          | 25          | 0.69                                    | 0.75            | 0.16                                     | 0.05            |
|                            |          | 15          | 0.56                                    | 0.18            | 0.19                                     | 0.05            |
|                            |          | 5           | 0.64                                    | –               | 0.17                                     | –               |
|                            | lake     | 5           | 1.63                                    | 0.63            | 0.24                                     | 0.06            |
| Feb. 20 <sup>th</sup> 2016 | tundra   | surface     | 0.60                                    | 0.15            | 0.24                                     | 0.08            |
| Mar. 3 <sup>rd</sup> 2016  | tundra   | surface     | 0.41                                    | 0.04            | 0.33                                     | 0.05            |
| Mar. 25 <sup>th</sup> 2016 | tundra   | surface     | 1.01                                    | 0.07            | 0.49                                     | 0.03            |
|                            |          | 50          | 0.58                                    | –               | 0.13                                     | –               |
|                            |          | 40          | 0.85                                    | –               | 0.14                                     | –               |
|                            |          | 30          | 0.54                                    | –               | 0.10                                     | –               |
|                            |          | 20          | 0.31                                    | 0.06            | <DL <sup>b</sup>                         | –               |
|                            |          | 10          | 0.46                                    | 0.13            | 0.19                                     | 0.09            |
|                            | lake     | 13          | 0.41                                    | 0.16            | 0.17                                     | 0.02            |
| Apr. 2 <sup>nd</sup> 2016  | tundra   | surface     | 1.46                                    | 0.16            | 1.15                                     | 0.15            |
| Apr. 13 <sup>th</sup> 2016 | tundra   | surface     | 0.21                                    | 0.03            | 0.13                                     | 0.01            |
| May 1 <sup>st</sup> 2016   | tundra   | surface     | 0.66                                    | 0.23            | 0.23                                     | 0.08            |
|                            |          | 33          | 0.21                                    | 0.12            | 0.12                                     | 0.11            |
|                            |          | 23          | 1.07                                    | 1.20            | 0.13                                     | 0.06            |
|                            |          | 15          | 0.43                                    | –               | 0.13                                     | –               |
|                            | lake     | 13          | 0.24                                    | 0.07            | 0.12                                     | 0.11            |

<sup>a</sup> standard deviation (n = 2 for snowpack and n = 3 for surface snow)

<sup>b</sup> below detection limit

“–” no data

**Table S3: Summary total ( $\text{Hg}_{\text{tot}}$ ) and dissolved Hg ( $\text{Hg}_{\text{diss}}$ ) concentrations in snowpack on the tundra of transect sampling sites.**

| site       | height (cm) | $\text{Hg}_{\text{tot}}$ (ng L <sup>-1</sup> ) | $\text{Hg}_{\text{diss}}$ (ng L <sup>-1</sup> ) |
|------------|-------------|------------------------------------------------|-------------------------------------------------|
| transect 1 | 40          | 0.22                                           | 0.13                                            |
|            | 30          | 0.22                                           | 0.11                                            |
|            | 20          | 1.32                                           | 0.17                                            |
| transect 2 | 33          | 0.27                                           | 0.13                                            |
|            | 23          | 0.15                                           | <DL <sup>a</sup>                                |
|            | 13          | 1.79                                           | 0.28                                            |
| transect 3 | 45          | 0.25                                           | 0.13                                            |
|            | 35          | 0.10                                           | <DL <sup>a</sup>                                |
|            | 25          | 0.18                                           | <DL <sup>a</sup>                                |
|            | 15          | 0.18                                           | <DL <sup>a</sup>                                |
| transect 4 | 32          | 0.57                                           | 0.38                                            |
|            | 22          | 0.38                                           | 0.13                                            |
|            | 12          | 0.34                                           | 0.24                                            |
| transect 5 | 40          | 0.60                                           | 0.34                                            |
|            | 30          | 0.32                                           | 0.23                                            |
|            | 20          | 0.36                                           | 0.14                                            |
|            | 10          | 0.92                                           | 0.23                                            |
| transect 6 | 61          | 0.86                                           | 0.46                                            |
|            | 51          | 1.47                                           | 0.86                                            |
|            | 41          | 0.54                                           | 0.19                                            |
| transect 7 | 29          | 0.42                                           | 0.29                                            |
|            | 19          | 0.78                                           | 0.26                                            |
| transect 8 | 25          | 3.79                                           | 0.74                                            |
|            | 15          | 0.73                                           | 0.20                                            |

<sup>a</sup> below detection limit

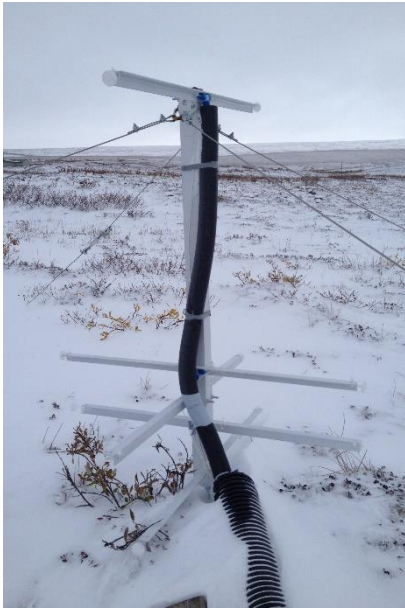

**Figure S1: Snow tower installation over the arctic tundra at Toolik Field Station.**

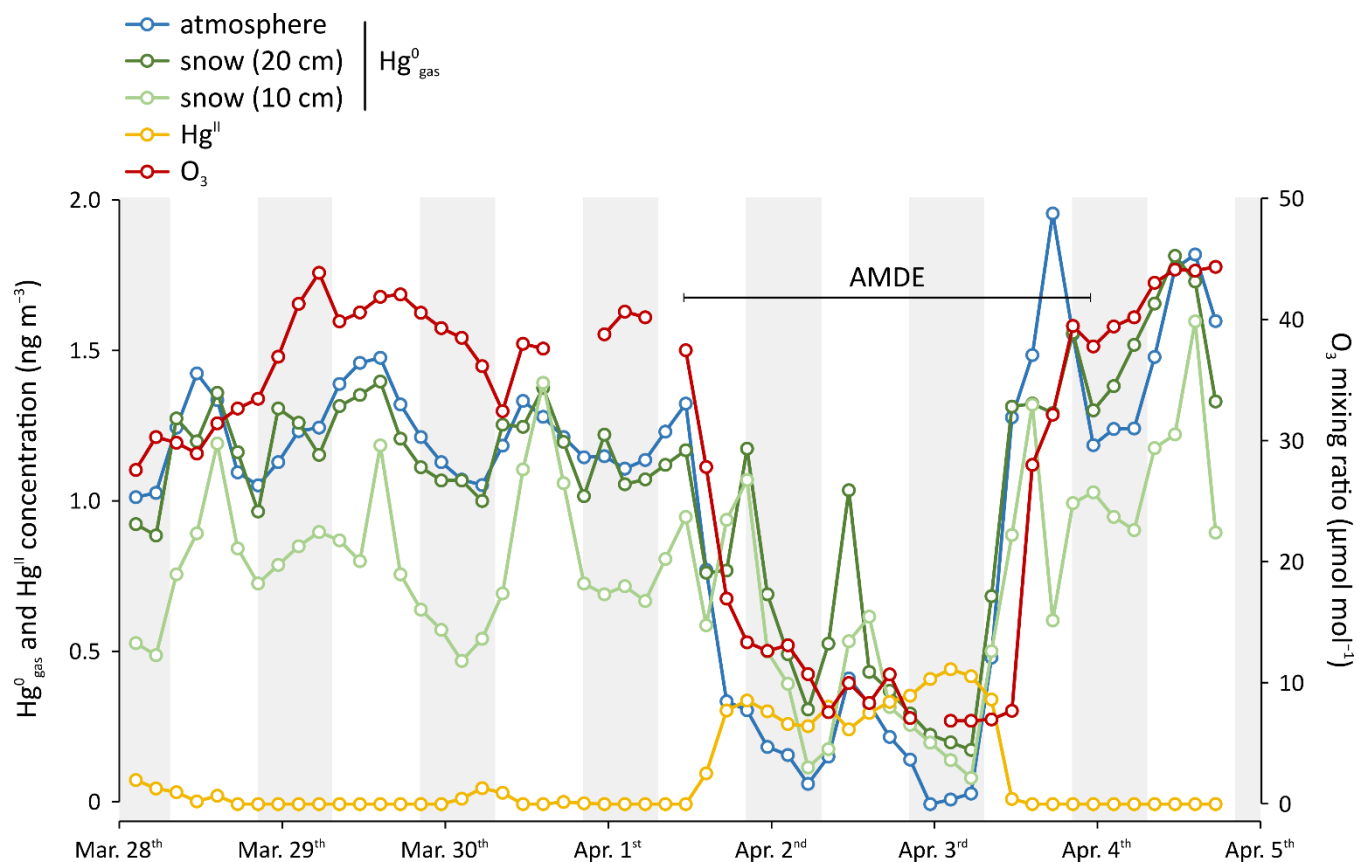

**Figure S2:  $\text{Hg}^0_{\text{gas}}$  concentrations (3-hours averages) in the atmosphere and snowpack interstitial air (10 and 20 cm above the ground surface), as well as  $\text{Hg}^{\text{II}}$  and  $\text{O}_3$  atmospheric measurements during a week in spring 2016, including an AMDE, measured at Toolik Field Station. The snow height was between 25 and 28 cm and surface snow  $\text{Hg}_{\text{tot}}$  concentrations between  $1.00 \pm 0.07$  (March 25<sup>th</sup>) and  $1.46 \pm 0.16$   $\text{ng L}^{-1}$  (April 2<sup>nd</sup>). The gray bars indicate nighttime periods.**
